# Supplementary material for: Clindamycin-Loaded Halloysite Nanotubes as the Antibacterial Component of Composite Hydrogel for Bone Repair
Source: MDPI journal article supplement (doi:10.3390/polym14235151), 2022-11-26
Supplement: s1 [file s1]

## Supplementary Materials

### “Clindamycin-loaded, acid-etched halloysite nanotubes as the antibacterial component of the multicomponent hydrogel for bone repair”

Adrianna Machowska, Joanna Klara, Gabriela Ledwójcik, Kinga Wójcik, Joanna Dulińska-Litewka, Anna Karewicz

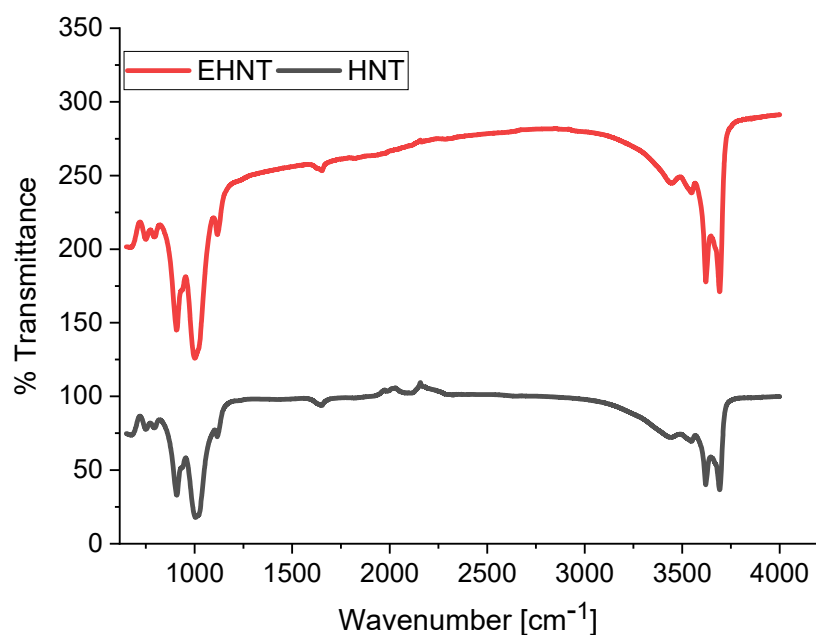

**Figure S1.** FTIR spectra of HNT and EHNT

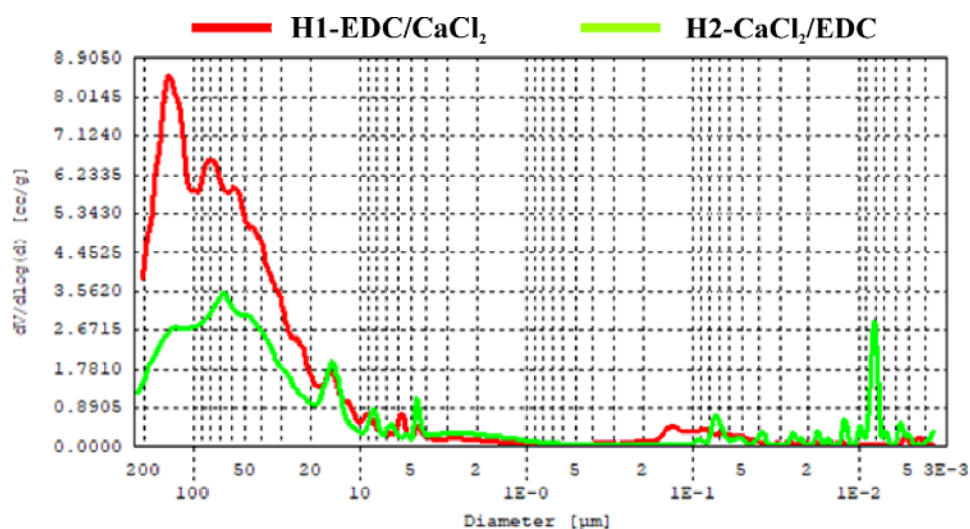

**Figure S2.** Porosimetry histograms for hydrogels H1-EDC/ $\text{CaCl}_2$  and H2- $\text{CaCl}_2$ /EDC
